# Supplementary material
Source: PubMed Central journal article supplement (PMC3570733)
Supplement: NIHMS439263-supplement-1_si_001.pdf [file NIHMS439263-supplement-1_si_001.pdf]

## **Supplementary information**

### **Structural and mechanistic characterization of L-histidinol phosphate phosphatase from the PHP family of proteins**

Swapnil V. Ghodge, Alexander A. Fedorov, Elena V. Fedorov, Brandan Hillerich, Ronald Seidel, Steven C. Almo and Frank M. Raushel

**Synthesis of *N*-formyl-L-histidinol phosphate.** The synthesis was carried out in two steps: *N*-formylation of L-histidinol, followed by phosphorylation to the desired product. *N*-formylation of L-histidinol was conducted using the method of Hosseini-Sarvari and coworker (S1). In brief, 80 mg (1 mmol) of zinc oxide and 0.22 mL (6 mmol) of formic acid were mixed in a 10 mL round-bottom flask. 428 mg (2 mmol) of L-histidinol hydrochloride was added and the reaction mixture was stirred for 3 hours at 70 °C in an oil bath. The reaction mixture was then cooled to room temperature, diluted with water and the formic acid was neutralized with NH<sub>4</sub>OH. The solvent was evaporated *in vacuo*. The residual solid was dissolved in 10 mM NH<sub>4</sub>HCO<sub>3</sub>, filtered and the pH was adjusted to ~8.2 using NH<sub>4</sub>OH. This solution was passed through DOWEX 50W x8 cation exchange column, pre-equilibrated with 10 mM NH<sub>4</sub>HCO<sub>3</sub>, pH 8.0, and washed with the same buffer. The flow-through was collected and the solvent was evaporated *in vacuo*. This procedure yielded 190 mg white solid (yield ~ 56%). <sup>1</sup>H-NMR δ 8.29 (s, 1H), 7.87 (s, 1H), 7.06 (s, 1H), 4.09 (m, 1H), 3.53 (d, 1H), 3.43 (d, 1H), 2.85 (d, 1H), 2.67 (d, 1H); mass, calculated for C<sub>7</sub>H<sub>11</sub>N<sub>3</sub>O<sub>2</sub> 169.0851 Da, found 170.0732 Da(M+H).

The phosphorylation of *N*-formyl-L-histidinol was carried out in the presence of polyphosphoric acid using a method described to synthesize L-histidinol phosphate (S2). 180 mg of *N*-formyl-L-histidinol was mixed with 1.5 g of polyphosphoric acid and the mixture was heated at 100 °C in an oil bath for one hour. The reaction was quenched with ice-cold water, neutralized using barium hydroxide, and the supernatant solution was purified using Dowex 1x8 anion exchange resin. The fractions from the anion exchange chromatography were analyzed using UV absorbance at 220 nm. The peak fractions were pooled together and the solvent was evaporated *in vacuo*. The procedure yielded a mixture of *N*-formyl-L-histidinol phosphate and

L-histidinol phosphate, along with inorganic phosphate. This was confirmed using  $^1\text{H}$  and  $^{31}\text{P}$ -NMR, and ESI-MS. Mass, calculated for  $\text{C}_7\text{H}_{12}\text{N}_3\text{O}_5\text{P}$  249.0515 Da, found 248.0576 Da (M-H). The mixture was used without further purification, and the relative concentrations were determined by  $^{31}\text{P}$ -NMR using methyl phosphonate as an internal standard.

## References

- S1. Hosseini-Sarvari, M., and Sharghi, H. (2006) ZnO as a new catalyst for N-formylation of amines under solvent-free conditions. *J. Org. Chem.* 71, 6652-6654.
- S2. Wang, L., Huang, H., Nguyen, H.H., Allen, K.N., Mariano, P.S., and Dunaway-Mariano, D. (2010) Divergence of biochemical function in the HAD superfamily: D-glycero-D-manno-heptose-1,7-bisphosphate phosphatase (GmhB). *Biochemistry* 49, 1072-1081.

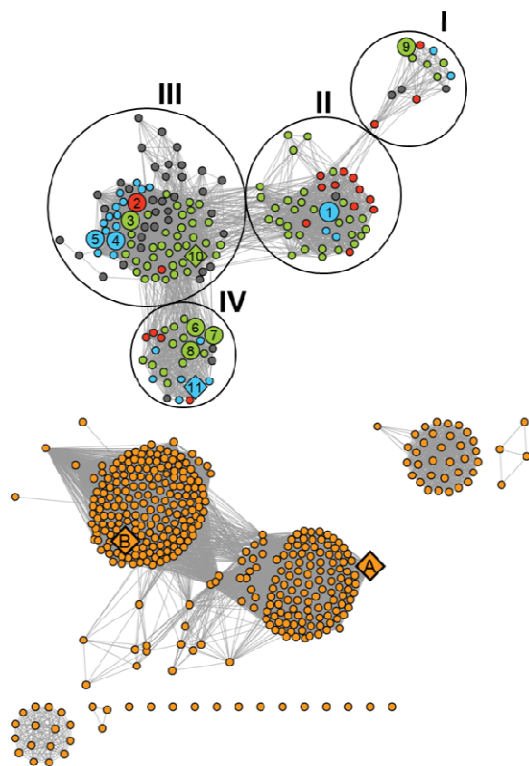

**Figure S1: Sequence network diagram of cog 1387 (same as figure 2), with HPP enzymes and close homologs grouped into four arbitrary zones I, II, III, and IV. The details of each node (protein) are provided in Tables S1-S4.**

**Table S1:** List of genes represented by blue nodes in **Figures 2 and S1**. These are authentic HPP enzymes which are found in the vicinity of the L-histidine biosynthesis operon on the genome of the organism.

| Organism                                                   | Locus tag             | GI number       | Sequence identity to L37351 | Zone      |
|------------------------------------------------------------|-----------------------|-----------------|-----------------------------|-----------|
| <i>Bacillus anthracis</i> str. Ames                        | BA_1432               | 30261511        | 22%                         | III       |
| <i>Bacillus anthracis</i> str. 'Ames Ancestor'             | GBAA_1432             | 47526706        | 22%                         | III       |
| <i>Bacillus anthracis</i> str. Sterne                      | BAS1324               | 49184341        | 22%                         | III       |
| <i>Bacillus cereus</i> 03BB102                             | BCA_1468              | 225863376       | 23%                         | III       |
| <i>Bacillus cereus</i> AH187                               | BCAH187_A1572         | 217958990       | 21%                         | III       |
| <i>Bacillus cereus</i> AH820                               | BCAH820_1504          | 218902621       | 22%                         | III       |
| <i>Bacillus cereus</i> ATCC 10987                          | BCE_1533              | 42780607        | 21%                         | III       |
| <i>Bacillus cereus</i> ATCC 14579                          | BC1413                | 161511209       | 21%                         | III       |
| <i>Bacillus cereus</i> B4264                               | BCB4264_A1466         | 218234061       | 21%                         | III       |
| <i>Bacillus cereus</i> E33L                                | BCZK1298              | 52143930        | 23%                         | III       |
| <i>Bacillus cereus</i> G9842                               | BCG9842_B3878         | 218896444       | 20%                         | III       |
| <i>Bacillus cereus</i> Q1                                  | BCQ_1486              | 222095146       | 21%                         | III       |
| <i>Bacillus thuringiensis</i> serovar konkukian str. 97-27 | BT9727_1297           | 49477223        | 25%                         | III       |
| <i>Bacillus thuringiensis</i> str. Al Hakam                | BALH_1268             | 118476974       | 23%                         | III       |
| <i>Bacillus weihenstephanensis</i> KBAB4                   | <b>BcerKBAB4_1335</b> | 163939326       | 24%                         | III       |
| <i>Clostridium botulinum</i> E3 str. Alaska E43            | CLH_2622              | 188588114       | 31%                         | II        |
| <i>Clostridium kluuyveri</i> DSM 555                       | CKL_1305              | 153953930       | 31%                         | II        |
| <i>Exiguobacterium sibiricum</i> 255-15                    | Exig_2369             | 172058376       | 24%                         | IV        |
| <i>Lactobacillus fermentum</i> IFO 3956                    | LAF_0754              | 184155230       | 22%                         | IV        |
| <i>Lactococcus lactis</i> subsp. cremoris MG1363           | llmg_1288             | 125624110       | 80%                         | II        |
| <i>Lactococcus lactis</i> subsp. cremoris SK11             | LACR_1325             | 116512055       | 79%                         | II        |
| <b><i>Lactococcus lactis</i> subsp. lactis II1403</b>      | <b>L37351</b>         | <b>15673198</b> | <b>100%</b>                 | <b>II</b> |
| <i>Listeria innocua</i> Clip11262                          | LMHCC_2060            | 16799654        | 26%                         | IV        |

|                                                           |                      |           |     |     |
|-----------------------------------------------------------|----------------------|-----------|-----|-----|
| <i>Listeria monocytogenes</i> EGD-e                       | lmo0570              | 16802613  | 25% | IV  |
| <i>Listeria monocytogenes</i> HCC23                       | LMHCC_2060           | 217965335 | 26% | IV  |
| <i>Listeria monocytogenes</i> serotype 4b<br>str. F2365   | <b>LMOf2365_0599</b> | 46906815  | 25% | IV  |
| <i>Listeria welshimeri</i> serovar 6b str.<br>SLCC5334    | lwe0536              | 116871956 | 36% | IV  |
| <i>Natranaerobius thermophilus</i><br>JW/NM-WN-LF         | Nther_1995           | 188586605 | 25% | III |
| <i>Oceanobacillus iheyensis</i> HTE831                    | OB0554               | 23098009  | 33% | II  |
| <i>Streptococcus gordonii</i> str. Challis<br>substr. CH1 | SGO_1401             | 157150565 | 26% | I   |
| <i>Streptococcus sanguinis</i> SK36                       | SSA_1439             | 125718249 | 25% | I   |

---

**Table S2:** List of genes represented by green nodes in **figures 2 and S1**. These represent authentic HPP enzymes identified based on their primary sequence. All the genes necessary for L-histidine biosynthesis are not found clustered together in these organisms.

| Organism                                             | Locus tag          | GI number | Sequence identity to L37351 | Zone |
|------------------------------------------------------|--------------------|-----------|-----------------------------|------|
| <i>Akkermansia muciniphila</i> ATCC BAA-835          | Amuc_1427          | 187735918 | 22%                         | III  |
| <i>Alkaliphilus metalliredigens</i> QYMF             | Amet_3162          | 150390911 | 33%                         | II   |
| <i>Alkaliphilus metalliredigens</i> QYMF             | Amet_3545          | 150391281 | 29%                         | II   |
| <i>Anoxybacillus flavithermus</i> WK1                | Aflv_0468          | 212638317 |                             | IV   |
| <i>Arcobacter butzleri</i> RM4018                    | Abu_1904           | 157738118 | 25%                         | III  |
| <i>Bacillus clausii</i> KSM-K16                      | ABC0751            | 56962525  | 22%                         | II   |
| <i>Bacillus clausii</i> KSM-K16                      | ABC2752            | 161349990 | 26%                         | IV   |
| <i>Bacillus halodurans</i> C-125                     | <b>BH3206</b>      | 15615768  | 28%                         | IV   |
| <i>Bacillus licheniformis</i> DSM 13 = ATCC 14580    | BLi03106           | 52786832  | 29%                         | IV   |
| <i>Bacillus pumilus</i> SAFR-032                     | BPUM_2607          | 157693363 | 25%                         | IV   |
| <i>Bacillus subtilis</i> subsp. subtilis str. 168    | <b>BSU29620</b>    | 16080014  | 29%                         | IV   |
| <i>Brevibacillus brevis</i> NBRC 100599              | <b>BBR47_00270</b> | 226309614 | 22%                         | III  |
| <i>Caldicellulosiruptor bescii</i> DSM 6725          | Athe_1711          | 222529696 | 33%                         | II   |
| <i>Caldicellulosiruptor saccharolyticus</i> DSM 8903 | Csac_2251          | 146297249 | 33%                         | II   |
| <i>Campylobacter concisus</i> 13826                  | CCC13826_1445      | 157165198 | 25%                         | III  |
| <i>Campylobacter curvus</i> 525.92                   | CCV52592_0277      | 154174464 | 25%                         | III  |
| <i>Campylobacter fetus</i> subsp. fetus 82-40        | CFF8240_1053       | 118475300 | 24%                         | III  |
| <i>Campylobacter hominis</i> ATCC BAA-381            | CHAB381_1502       | 154148198 | 26%                         | III  |
| <i>Candidatus Desulforudis audaxviator</i> MP104C    | Daud_1449          | 169831605 | 23%                         | III  |
| <i>Carboxydothemus hydrogenoformans</i> Z-2901       | CHY_1234           | 78043027  | 28%                         | II   |
| <i>Carboxydothemus</i>                               | CHY_2084           | 78043205  | 27%                         | III  |

*hydrogenoformans* Z-2901

|                                                 |             |           |     |     |
|-------------------------------------------------|-------------|-----------|-----|-----|
| <i>Clostridium acetobutylicum</i> ATCC 824      | CA_C2727    | 15025762  | 30% | II  |
| <i>Clostridium beijerinckii</i> NCIMB 8052      | Cbei_0975   | 150015861 | 34% | II  |
| <i>Clostridium beijerinckii</i> NCIMB 8052      | Cbei_2106   | 150016975 | 28% | IV  |
| <i>Clostridium botulinum</i> A str. ATCC 3502   | CBO2571     | 148380526 | 34% | II  |
| <i>Clostridium botulinum</i> A str. Hall        | CLC_2443    | 153937403 | 34% | II  |
| <i>Clostridium botulinum</i> B1 str. Okra       | CLD_1994    | 170757551 | 35% | II  |
| <i>Clostridium botulinum</i> E3 str. Alaska E43 | CLH_2953    | 188590530 | 33% | II  |
| <i>Clostridium botulinum</i> F str. Langeland   | CLI_2634    | 153940040 | 35% | II  |
| <i>Clostridium cellulolyticum</i> H10           | Ccel_1927   | 220929346 | 37% | II  |
| <i>Clostridium difficile</i> 630                | CD630_07370 | 126698317 | 24% | IV  |
| <i>Clostridium difficile</i> 630                | CD630_21910 | 126699807 | 29% | II  |
| <i>Clostridium kluuyveri</i> DSM 555            | CKL_0268    | 153952905 | 33% | II  |
| <i>Clostridium kluuyveri</i> NBRC 12016         | CKR_0224    | 219853567 | 34% | II  |
| <i>Clostridium kluuyveri</i> NBRC 12016         | CKR_1201    | 219854544 | 31% | II  |
| <i>Clostridium novyi</i> NT                     | NT01CX_0001 | 118444162 | 28% | II  |
| <i>Clostridium phytofermentans</i> ISDg         | Cphy_2903   | 160881032 | 30% | II  |
| <i>Clostridium thermocellum</i> ATCC 27405      | Cthe_0724   | 125973242 | 33% | II  |
| <i>Deinococcus deserti</i> VCD115               | Deide_07040 | 226355575 | 25% | III |
| <i>Deinococcus geothermalis</i> DSM 11300       | Dgeo_1608   | 94985708  | 26% | III |
| <i>Deinococcus radiodurans</i> R1               | DR_0470     | 15805497  | 26% | III |
| <i>Desulfitobacterium hafniense</i> DCB-2       | Dhaf_2109   | 219668146 | 30% | II  |
| <i>Desulfitobacterium hafniense</i> DCB-2       | Dhaf_4086   | 219670096 | 27% | III |
| <i>Desulfitobacterium hafniense</i> Y51         | DSY1025     | 89893771  | 29% | II  |
| <i>Desulfitobacterium hafniense</i> Y51         | DSY2929     | 89895675  | 27% | III |
| <i>Desulfotalea psychrophila</i> LSv54          | DP2888      | 51246740  | 25% | IV  |
| <i>Desulfotomaculum reducens</i> MI-1           | Dred_0665   | 134298533 | 24% | III |
| <i>Desulfovibrio alaskensis</i> G20             | Dde_1057    | 78356104  | 24% | II  |
| <i>Desulfovibrio desulfuricans</i> subsp.       | Ddes_1985   | 220905247 | 22% | III |



desulfuricans str. ATCC 27774

|                                                                    |                  |           |     |     |
|--------------------------------------------------------------------|------------------|-----------|-----|-----|
| <i>Desulfovibrio vulgaris</i> DP4                                  | Dvul_0754        | 120601804 | 21% | III |
| <i>Desulfovibrio vulgaris</i> str. 'Miyazaki F'                    | DvMF_0940        | 218886042 | 22% | III |
| <i>Desulfovibrio vulgaris</i> str.<br>Hildenborough                | DVU2490          | 46580894  | 21% | III |
| <i>Dictyoglomus turgidum</i> DSM 6724                              | Dtur_0185        | 217966622 | 25% | III |
| <i>Geobacillus kaustophilus</i> HTA426                             | <b>GK2799</b>    | 56421334  | 26% | IV  |
| <i>Geobacillus thermodenitrificans</i><br>NG80-2                   | GTNG_2701        | 138896338 | 24% | IV  |
| <i>Helicobacter hepaticus</i> ATCC 51449                           | HH1714           | 32267213  | 26% | III |
| <i>Heliobacterium modesticaldum</i> Ice1                           | HM1_1034         | 167629052 | 30% | II  |
| <i>Leuconostoc mesenteroides</i> subsp.<br>mesenteroides ATCC 8293 | LEUM_1558        | 116618652 | 26% | IV  |
| <i>Lysinibacillus sphaericus</i> C3-41                             | Bsph_4155        | 169829588 | 24% | IV  |
| <i>Methylacidiphilum infernorum</i> V4                             | Minf_0970        | 189218982 | 29% | II  |
| <i>Moorella thermoacetica</i> ATCC 39073                           | Moth_0817        | 83589668  | 26% | III |
| <i>Nautilia profundicola</i> AmH                                   | NAMH_1464        | 224373484 | 25% | II  |
| <i>Nitratiruptor</i> sp. SB155-2                                   | NIS_1518         | 152991260 | 21% | III |
| <i>Oceanobacillus iheyensis</i> HTE831                             | OB2759           | 23100214  | 28% | II  |
| <i>Pelotomaculum thermopropionicum</i><br>SI                       | PTH_1872         | 147678207 | 25% | III |
| <i>Rubrobacter xylanophilus</i> DSM 9941                           | Rxyl_2572        | 108805364 | 21% | III |
| <i>Streptococcus agalactiae</i> A909                               | SAK_1303         | 76563046  | 27% | I   |
| <i>Streptococcus agalactiae</i> NEM316                             | gbs1289          | 25011338  | 27% | I   |
| <i>Streptococcus mutans</i> UA159                                  | <b>SMU_1486c</b> | 24379879  | 28% | I   |
| <i>Streptococcus thermophilus</i><br>CNRZ1066                      | str1232          | 55823151  | 25% | I   |
| <i>Streptococcus thermophilus</i> LMD-9                            | STER_1212        | 116627978 | 26% | I   |
| <i>Sulfurimonas denitrificans</i> DSM 1251                         | Suden_1866       | 78778060  | 25% | III |
| <i>Sulfurovum</i> sp. NBC37-1                                      | SUN_0354         | 152991950 | 24% | III |
| <i>Symbiobacterium thermophilum</i> IAM<br>14863                   | STH2574          | 51893712  | 24% | III |
| <i>Thermotoga maritima</i> MSB8                                    | TM0804           | 15643567  | 27% | II  |
| <i>Thermotoga petrophila</i> RKU-1                                 | Tpet_0124        | 148269269 | 27% | II  |
| <i>Thermotoga</i> sp. RQ2                                          | TRQ2_0122        | 170287929 | 27% | II  |

|                                        |          |          |     |     |
|----------------------------------------|----------|----------|-----|-----|
| <i>Thermus thermophilus</i> HB27       | TTC1652  | 46199954 | 26% | III |
| <i>Thermus thermophilus</i> HB8        | TTHA0331 | 55980300 | 26% | III |
| <i>Wolinella succinogenes</i> DSM 1740 | WS0471   | 34556896 | 23% | III |

---

**Table S3:** List of genes represented by red nodes in **figures 2 and S1**. These represent HPP homologs identified based on their primary sequence, which have all the sequence features necessary for HPP activity. However, the genomes of these organisms do not possess several genes necessary for L-histidine biosynthesis, based on the current available information.

| Organism                                                          | Locus tag        | GI number | Sequence identity to L37351 | Zone |
|-------------------------------------------------------------------|------------------|-----------|-----------------------------|------|
| <i>Clostridium botulinum</i> A3 str. Loch Maree                   | CLK_1956         | 170758750 | 34%                         | II   |
| <i>Clostridium botulinum</i> B str. Eklund 17B                    | CLL_A3211        | 187934801 | 32%                         | II   |
| <i>Clostridium botulinum</i> B str. Eklund 17B                    | CLL_A2893        | 187935558 | 32%                         | II   |
| <i>Clostridium perfringens</i> ATCC 13124                         | CPF_1312         | 110798699 | 33%                         | IV   |
| <i>Clostridium perfringens</i> ATCC 13124                         | CPF_2137         | 110800838 | 30%                         | II   |
| <i>Clostridium perfringens</i> SM101                              | CPR_1849         | 110802089 | 30%                         | II   |
| <i>Clostridium perfringens</i> SM101                              | CPR_1128         | 110802533 | 33%                         | IV   |
| <i>Clostridium perfringens</i> str. 13                            | CPE1056          | 18310038  | 32%                         | IV   |
| <i>Clostridium perfringens</i> str. 13                            | CPE1883          | 18310865  | 30%                         | II   |
| <i>Clostridium tetani</i> E88                                     | CTC01046         | 28210748  | 33%                         | II   |
| <i>Coprothermobacter proteolyticus</i> DSM 5265                   | COPRO5265_0239   | 206895927 | 30%                         | II   |
| <i>Fervidobacterium nodosum</i> Rt17-B1                           | Fnod_0198        | 154248897 | 30%                         | II   |
| <i>Fingoldia magna</i> ATCC 29328                                 | FMG_0406         | 169824103 | 27%                         | I    |
| <i>Fusobacterium nucleatum</i> subsp. <i>nucleatum</i> ATCC 25586 | FN0428           | 19703770  | 26%                         | I    |
| <i>Lawsonia intracellularis</i> PHE/MN1-00                        | LI0725           | 94987167  | 21%                         | III  |
| <i>Leuconostoc citreum</i> KM20                                   | LCK_00178        | 170016536 | 25%                         | IV   |
| <i>Macrococcus caseolyticus</i> JCSC5402                          | <b>MCCL_0344</b> | 222150594 | 27%                         | III  |
| <i>Streptococcus thermophilus</i> LMG 18311                       | stu1232          | 55821239  | 26%                         | I    |
| <i>Thermosipho africanus</i> TCF52B                               | THA_992          | 217077076 | 28%                         | II   |
| <i>Thermosipho melanesiensis</i> BI429                            | TmeI_0785        | 150020678 | 28%                         | II   |

**Table S4:** List of genes represented by gray nodes in **figures 2 and S1**. These represent enzymes which bear reasonable sequence identity to authentic HPP enzymes but lack the primary sequence features necessary for HPP activity, as determined in this study. Hence, these enzymes must have a different physiological function.

| Organism                                     | Locus tag   | GI number | Sequence identity to L37351 | Zone |
|----------------------------------------------|-------------|-----------|-----------------------------|------|
| <i>Agrobacterium radiobacter</i> K84         | Arad_7540   | 222081247 | 22%                         | III  |
| <i>Alkaliphilus oremlandii</i> OhILAs        | Clos_0339   | 158319390 | 28%                         | III  |
| <i>Anoxybacillus flavithermus</i> WK1        | Aflv_1054   | 212638895 | 26%                         | III  |
| <i>Bacteroides fragilis</i> NCTC 9343        | BF0879      | 60680430  | 28%                         | III  |
| <i>Bacteroides fragilis</i> NCTC 9343        | BF1597      | 60681093  | 24%                         | III  |
| <i>Bacteroides fragilis</i> YCH46            | BF0961      | 53712253  | 28%                         | III  |
| <i>Bacteroides fragilis</i> YCH46            | BF1583      | 53712875  | 24%                         | III  |
| <i>Bacteroides thetaiotaomicron</i> VPI-5482 | BT_1478     | 29346888  | 24%                         | III  |
| <i>Bacteroides thetaiotaomicron</i> VPI-5482 | BT_4257     | 29349665  | 28%                         | III  |
| <i>Brachyspira hyodysenteriae</i> WA1        | BHWA1_00960 | 225619891 | 25%                         | III  |
| <i>Brevibacillus brevis</i> NBRC 100599      | BBR47_43860 | 226313971 | 22%                         | III  |
| <i>Clostridium novyi</i> NT                  | NT01CX_0128 | 118444797 | 31%                         | II   |
| <i>Clostridium perfringens</i> ATCC 13124    | CPF_1620    | 110798872 | 29%                         | III  |
| <i>Clostridium perfringens</i> ATCC 13124    | CPF_0801    | 110799120 | 28%                         | IV   |
| <i>Clostridium perfringens</i> ATCC 13124    | CPF_1229    | 110801334 | 24%                         | III  |
| <i>Clostridium perfringens</i> SM101         | CPR_1040    | 110803006 | 24%                         | III  |
| <i>Clostridium perfringens</i> SM101         | CPR_0788    | 110803561 | 33%                         | IV   |
| <i>Clostridium perfringens</i> str. 13       | CPE0804     | 18309786  | 27%                         | IV   |
| <i>Clostridium perfringens</i> str. 13       | CPE0972     | 18309954  | 24%                         | III  |
| <i>Clostridium perfringens</i> str. 13       | CPE1370     | 18310352  | 29%                         | III  |
| <i>Clostridium phytofermentans</i> ISDg      | Cphy_2094   | 160880232 | 34%                         | III  |

|                                                                                |              |           |     |     |
|--------------------------------------------------------------------------------|--------------|-----------|-----|-----|
| <i>Desulfobacterium autotrophicum</i> HRM2                                     | HRM2_30690   | 224370152 | 27% | III |
| <i>Desulfotalea psychrophila</i> LSV54                                         | DP0093       | 51243945  | 35% | III |
| <i>Desulfotomaculum reducens</i> MI-1                                          | Dred_2577    | 134300416 | 27% | III |
| <i>Desulfovibrio desulfuricans</i> subsp. <i>desulfuricans</i> str. ATCC 27774 | Ddes_0366    | 220903646 | 18% | III |
| <i>Dictyoglomus thermophilum</i> H-6-12                                        | DICTH_1913   | 206900475 | 24% | III |
| <i>Geobacillus kaustophilus</i> HTA426                                         | GK2248       | 56420783  | 24% | III |
| <i>Geobacillus thermodenitrificans</i> NG80-2                                  | GTNG_2185    | 138895826 | 25% | III |
| <i>Halorubrum lacusprofundi</i> ATCC 49239                                     | Hlac_1354    | 222479778 | 28% | III |
| <i>Halothermothrix orenii</i> H 168                                            | Hore_11520   | 220931991 | 26% | III |
| <i>Heliobacterium modesticaldum</i> Ice1                                       | HM1_2038     | 167630107 | 25% | III |
| <i>Lactobacillus casei</i> ATCC 334                                            | LSEI_1206    | 116494700 | 25% | I   |
| <i>Lactobacillus casei</i> BL23                                                | LCABL_14250  | 191638198 | 25% | I   |
| <i>Lysinibacillus sphaericus</i> C3-41                                         | Bsph_1650    | 169827220 | 24% | III |
| <i>Methylacidiphilum infernorum</i> V4                                         | Minf_0443    | 189218458 | 28% | III |
| <i>Parabacteroides distasonis</i> ATCC 8503                                    | BDI_1238     | 150007878 | 32% | III |
| <i>Pediococcus pentosaceus</i> ATCC 25745                                      | PEPE_0107    | 116491924 | 24% | I   |
| <i>Pseudomonas aeruginosa</i> UCBPP-PA14                                       | PA14_03330   | 116053983 | 23% | III |
| <i>Syntrophomonas wolfei</i> subsp. <i>wolfei</i> str. Goettingen              | SwoI_0653    | 114566197 | 27% | III |
| <i>Thermoanaerobacter pseudethanolicus</i> ATCC 33223                          | Teth39_0146  | 167036577 | 25% | III |
| <i>Thermoanaerobacter</i> sp. X514                                             | Teth514_2305 | 167040919 | 25% | III |
| <i>Treponema denticola</i> ATCC 35405                                          | TDE0796      | 42526308  | 24% | III |

---
